# Supplementary material for: Plant-Based Diet Indices and Their Association with Frailty in Older Adults: A CLHLS-Based Cohort Study
Source: MDPI journal article supplement (doi:10.3390/nu15245120), 2023-12-15
Supplement: s1 [file s1]

Contents

Table S1. Scoring of plant-based diet indices. .... 1

Table S2. Scoring of frailty index.....3

Table S3. Baseline characteristics of participants by sex.....5

**Table S1. Scoring of plant-based diet indices.**

| Types                              | Food                        | Frequency       | PDI | hPDI | uPDI |
|------------------------------------|-----------------------------|-----------------|-----|------|------|
| Healthful<br>plant-based<br>food   | Whole grain                 | Yes             | 5   | 5    | 1    |
|                                    |                             | No              | 1   | 1    | 5    |
|                                    | Vegetable oil               | Yes             | 5   | 5    | 1    |
|                                    |                             | No              | 1   | 1    | 5    |
|                                    | Fresh fruit                 | Almost everyday | 5   | 5    | 1    |
|                                    |                             | Except winter   | 4   | 4    | 2    |
|                                    |                             | Occasionally    | 2   | 2    | 4    |
|                                    |                             | Rarely or never | 1   | 1    | 5    |
|                                    | Vegetable                   | Almost everyday | 5   | 5    | 1    |
|                                    |                             | Except winter   | 4   | 4    | 2    |
|                                    |                             | Occasionally    | 2   | 2    | 4    |
|                                    |                             | Rarely or never | 1   | 1    | 5    |
|                                    | Legume                      | Almost everyday | 5   | 5    | 1    |
|                                    |                             | ≥1 time/week    | 4   | 4    | 2    |
|                                    |                             | ≥1 time/month   | 3   | 3    | 3    |
|                                    |                             | Occasionally    | 2   | 2    | 4    |
|                                    |                             | Rarely or never | 1   | 1    | 5    |
|                                    | Garlic                      | Almost everyday | 5   | 5    | 1    |
|                                    |                             | ≥1 time/week    | 4   | 4    | 2    |
|                                    |                             | ≥1 time/month   | 3   | 3    | 3    |
|                                    |                             | Occasionally    | 2   | 2    | 4    |
|                                    |                             | Rarely or never | 1   | 1    | 5    |
|                                    | Nut products                | Almost everyday | 5   | 5    | 1    |
|                                    |                             | ≥1 time/week    | 4   | 4    | 2    |
|                                    |                             | ≥1 time/month   | 3   | 3    | 3    |
|                                    |                             | Occasionally    | 2   | 2    | 4    |
|                                    |                             | Rarely or never | 1   | 1    | 5    |
|                                    | Tea                         | Almost everyday | 5   | 5    | 1    |
|                                    |                             | ≥1 time/week    | 4   | 4    | 2    |
|                                    |                             | ≥1 time/month   | 3   | 3    | 3    |
|                                    |                             | Occasionally    | 2   | 2    | 4    |
|                                    |                             | Rarely or never | 1   | 1    | 5    |
| Unhealthful<br>plant-based<br>food | Refined grain               | Yes             | 5   | 1    | 5    |
|                                    |                             | No              | 1   | 5    | 1    |
|                                    | Salt-preserved<br>vegetable | Almost everyday | 5   | 1    | 5    |
|                                    |                             | ≥1 time/week    | 4   | 2    | 4    |
|                                    |                             | ≥1 time/month   | 3   | 3    | 3    |
|                                    |                             | Occasionally    | 2   | 4    | 2    |
|                                    |                             | Rarely or never | 1   | 5    | 1    |
|                                    | Sugar                       | Almost everyday | 5   | 1    | 5    |
|                                    |                             | ≥1 time/week    | 4   | 2    | 4    |
|                                    |                             | ≥1 time/month   | 3   | 3    | 3    |
|                                    |                             | Occasionally    | 2   | 4    | 2    |
|                                    |                             | Rarely or never | 1   | 5    | 1    |

|                   |               |                 |   |
|-------------------|---------------|-----------------|---|
| Animal-based food | Animal fat    | Yes             | 1 |
|                   |               | No              | 5 |
|                   | Meat          | Almost everyday | 1 |
|                   |               | ≥1 time/week    | 2 |
|                   |               | ≥1 time/month   | 3 |
|                   |               | Occasionally    | 4 |
|                   |               | Rarely or never | 5 |
|                   | Fish          | Almost everyday | 1 |
|                   |               | ≥1 time/week    | 2 |
|                   |               | ≥1 time/month   | 3 |
|                   |               | Occasionally    | 4 |
|                   |               | Rarely or never | 5 |
|                   | Egg           | Almost everyday | 1 |
|                   |               | ≥1 time/week    | 2 |
|                   |               | ≥1 time/month   | 3 |
|                   |               | Occasionally    | 4 |
|                   |               | Rarely or never | 5 |
|                   | Milk products | Almost everyday | 1 |
|                   |               | ≥1 time/week    | 2 |
|                   |               | ≥1 time/month   | 3 |
|                   |               | Occasionally    | 4 |
|                   |               | Rarely or never | 5 |

**Table S2. Scoring of frailty index.**

|                        | <b>Variables</b>                                  | <b>Values</b>                                                                                          |
|------------------------|---------------------------------------------------|--------------------------------------------------------------------------------------------------------|
| <b>Basic situation</b> | 1. self-reported health                           | very good=0; good=0.25; so so=0.5; bad=0.75; very bad=1                                                |
|                        | 2. feel fearful or anxious                        | never=0; seldom=0.25; sometimes=0.5; often=0.75; always=1;                                             |
|                        | 3. feel useless with age                          | never=0; seldom=0.25; sometimes=0.5; often=0.75; always=1;                                             |
|                        | 4. look on the bright side of things              | always=0; often=0.25; sometimes=0.5; seldom=0.75; never=1;                                             |
|                        | 5. keep my belongings neat and clean              | always=0; often=0.25; sometimes=0.5; seldom=0.75; never=1;                                             |
|                        | 6. make own decision                              | always=0; often=0.25; sometimes=0.5; seldom=0.75; never=1;                                             |
|                        | 7. the health of interviewee rated by interviewer | surprisingly healthy=0; relatively healthy=0.33; moderately ill=0.67; very ill=1                       |
| <b>Basic ability</b>   | 8. bathing                                        | without assistance=0; one part assistance=0.5; more than one part assistance=1                         |
|                        | 9. dressing                                       | without assistance=0; one part assistance=0.5; more than one part assistance=1                         |
|                        | 10. toileting                                     | without assistance=0; some assistance=0.5; don't use toilet=1                                          |
|                        | 11. indoor transferring                           | without assistance=0; with assistance=0.5; bedridden=1                                                 |
|                        | 12. continence                                    | without assistance=0; occasional accidents=0.5; incontinent=1                                          |
|                        | 13. feeding                                       | without assistance=0; with some help=0.5; need feeding=1                                               |
|                        | 14. do you do house work at present?              | almost everyday=0; $\geq 1$ / week=0.25; $\geq 1$ /month & $< 1$ /week=0.5; $< 1$ /month=0.75; never=1 |
|                        | 15. visual function                               | can see and distinguish=0; can see only=0.33; can't see=0.67; blind=1                                  |
|                        | 16. was interviewee able to hear?                 | yes, without hearing aid=0; yes, but needs hearing aid=0.33; partly, despite hearing aid=0.67; no=1    |
|                        | 17. heart rate                                    | $< 80$ =0; $\geq 80$ =1                                                                                |
|                        | 18. hand behind neck                              | both hands=0; right hand=0.5; left hand=0.5; neither hand=1                                            |
|                        | 19. hand behind lower back                        | both hands=0; right hand=0.5; left                                                                     |

|                 |                                                                              |                                                        |
|-----------------|------------------------------------------------------------------------------|--------------------------------------------------------|
|                 |                                                                              | hand=0.5; neither hand=1                               |
|                 | 20. able to stand up from sitting in a chair?                                | yes, without using hands=0; yes, using hands=0.5; no=1 |
|                 | 21. able to pick up a book from the floor?                                   | yes, standing=0; yes, sitting=0.5; no=1                |
|                 | 22. able to use chopsticks to eat?                                           | yes=0; no=1                                            |
|                 | 23. steps used to turn around 360 with help?                                 | ≤4=0; >4=0.5; cannot turn around=1                     |
| Medical history | 24. Number of times suffering from serious illness within the past two years | 0=0; 1=1; >1=2                                         |
|                 | 25. suffering from hypertension?                                             | no=0; yes=1                                            |
|                 | 26. suffering from diabetes?                                                 | no=0; yes=1                                            |
|                 | 27. suffering from diabetes?                                                 | no=0; yes=1                                            |
|                 | 28. suffering from stroke or cvd?                                            | no=0; yes=1                                            |
|                 | 29. suffering from bronchitis, emphysema, pneumonia, asthma?                 | no=0; yes=1                                            |
|                 | 30. suffering from tuberculosis?                                             | no=0; yes=1                                            |
|                 | 31. suffering from cancer?                                                   | no=0; yes=1                                            |
|                 | 32. suffering from gastric or duodenal ulcer?                                | no=0; yes=1                                            |
|                 | 33. suffering from parkinson's disease?                                      | no=0; yes=1                                            |
|                 | 34. suffering from bedsore?                                                  | no=0; yes=1                                            |
|                 | 35. suffering from dementia?                                                 | no=0; yes=1                                            |

**Table S3. Baseline characteristics of participants by sex.**

| Characteristics      | N          | Sex        |            | $\chi^2$ | P       |
|----------------------|------------|------------|------------|----------|---------|
|                      |            | Male       | Female     |          |         |
| Age(years)           | 2883(100)  | 80(10)     | 82(11)     | 24.30    | < 0.001 |
| Resdic               |            |            |            | 0.89     | 0.35    |
| Urban                | 361(12.5)  | 186(51.5)  | 175(48.5)  |          |         |
| Town                 | 2522(87.5) | 1366(54.2) | 1156(45.8) |          |         |
| Economic situation   |            |            |            | 1.96     | 0.18    |
| Wealthy              | 483(16.8)  | 274(56.7)  | 209(43.3)  |          |         |
| Not wealthy          | 2400(83.2) | 1278(53.2) | 1122(46.8) |          |         |
| Cohabitation status  |            |            |            | 15.97    | < 0.001 |
| Solitude             | 544(18.9)  | 251(46.1)  | 293(53.9)  |          |         |
| Not living alone     | 2339(81.1) | 1301(55.6) | 1038(44.4) |          |         |
| Marital status       |            |            |            | 222.92   | < 0.001 |
| Married/cohabitating | 1306(45.3) | 902(69.1)  | 404(30.9)  |          |         |
| Others               | 1577(54.7) | 650(41.2)  | 927(58.8)  |          |         |
| Smoking status       |            |            |            | 899.56   | < 0.001 |
| never                | 1718(59.6) | 531(30.9)  | 1187(69.1) |          |         |
| former               | 429(14.9)  | 370(86.2)  | 59(13.8)   |          |         |
| now                  | 736(25.5)  | 651(88.5)  | 85(11.5)   |          |         |
| Alcohol consumption  |            |            |            | 518.61   | < 0.001 |
| never                | 1813(62.9) | 682(37.6)  | 1131(62.4) |          |         |
| former               | 357(12.4)  | 280(78.4)  | 77(21.6)   |          |         |
| now                  | 713(24.7)  | 590(82.7)  | 123(17.3)  |          |         |
| Physical exercise    |            |            |            | 37.84    | < 0.001 |
| never                | 1611(55.9) | 787(48.9)  | 824(51.1)  |          |         |
| former               | 255(8.8)   | 145(56.9)  | 110(43.1)  |          |         |
| now                  | 1017(35.3) | 620(61.0)  | 397(39.0)  |          |         |
| BMI(kg/m2)           |            |            |            | 37.61    | < 0.001 |
| low                  | 696(24.1)  | 313(45.0)  | 383(55.0)  |          |         |
| nomal                | 1749(60.7) | 1004(57.4) | 745(42.6)  |          |         |
| overweight           | 355(12.3)  | 201(56.6)  | 154(43.4)  |          |         |
| Obesity              | 83(2.9)    | 34(41.0)   | 49(59.0)   |          |         |
